# Supplementary material for: Lane and Heat Draw Have Little Effect on Placings and Progression in Olympic and IAAF World Championship 800 m Running
Source: Front Sports Act Living. 2019 Sep 3;1:19. doi: 10.3389/fspor.2019.00019 (PMC7739691; doi:10.3389/fspor.2019.00019)
Supplement: Supplementary file 2 [file Data_Sheet_2.xlsx]

## Sheet: Table 2 Women
2003	Posn	No.	Name		Nation	Time	Result	Notes	Lane	SB		2004	Posn	No.	Name		Nation	Time	Result	Notes	Lane	SB		2005	Posn	No.	Name		Nation	Time	Result	Notes	Lane	SB		2007	Posn	No.	Name		Nation	Time	Result	Notes	Lane	SB		2008	Posn
Heat 1	1	956	Natalya	Evdokimova	RUS	121.05	Q		2	118.75		Heat 1	1		Hasna	Benhassi	MAR	121.2	Q		4	119.11		Heat 1	1	782	Hazel	Clark	USA	121.91	Q		2	117.99		Heat 1	1	815	Svetlana	Klyuka	RUS	120.11	Q		8	118.63		Heat 1	1
Heat 1	2	702	Mina	Hammou	MAR	121.1	Q		8	117.82		Heat 1	2		Maria	Mutola	MOZ	121.5	Q		7	117.47		Heat 1	2	416	Kenia	Sinclair	JAM	122.18	Q		6	118.88		Heat 1	2	534	Marian	Burnett	GUY	120.53	Q		2	119.84		Heat 1	2
Heat 1	3	526	Judit	Varga	HUN	121.47	Q		1	119.46		Heat 1	3		Tetiana	Petlyuk	UKR	122.07	Q		2	119.62		Heat 1	3	482	Mina	Hammou	MAR	122.36	Q		1	120.09		Heat 1	3	663	Mina	Hammou	MAR	120.85	Q	SB	3	121.09		Heat 1	3
Heat 1	4	1161	Jennifer	Toomey	USA	121.75	q		3	119.75		Heat 1	4		Marian	Burnett	GUY	122.12	q		6	119.47		Heat 1	4	507	Agnes	Samaria	NAM	122.46	Q		8	119.91		Heat 1	4	782	Mihaela	Neacsu	ROU	121.08			9	119.82		Heat 1	4
Heat 1	5	263	Heidi	Jensen	DEN	122.01	q	SB	5	122.36		Heat 1	5		Nédia	Semedo	POR	122.61			8	120.49		Heat 1	5	338	Neisha	Bernard-Thomas	GRN	122.5			3	121.07		Heat 1	5	998	Alice	Schmidt	USA	122.49			6	118.75		Heat 1	5
Heat 1	6	292	Esther	Desviat	ESP	123.42			4	120.76		Heat 1	6		Olga	Cristea	MDA	128.7			3	121.29		Heat 1	6	689	Brigita	Langerholc	SLO	123.06			4	121.41		Heat 1	6	270	Josiane	Tito	BRA	123.7			7	121.28		Heat 1	6
Heat 1	7	404	Charlotte	Moore	GBR	123.8			7	121.21		Heat 1	7		Marlyse	Nsourou	GAB	132.35		NR	5	134.73		Heat 1	7	736	Binnaz	Uslu	TUR	123.73			5	122.68		Heat 1	7	205	Natalia	Gallego	AND	133.46			4	133.04		Heat 1	7
	8	269	Marie-Lyne	Joseph	DMA	137.73		PB	6	144.3														Heat 1	8	260	Marlyse	Nsourou	GAB	134.47		SB	7			Heat 1	8	484	Emilia	Ondo	GEQ	135.72		NR	5	137.25
Heat 2	1	748	Maria	Mutola	MOZ	120.81	Q		7	115.55		Heat 2	1		Maria	Cioncan	ROU	119.64	Q	PB	8	123.49		Heat 2	1	147	Zulia	Calatayud	CUB	120.77	Q		3	118.07		Heat 2	1	819	Olga	Kotlyarova	RUS	121.75	Q		5	118.14		Heat 2	1
Heat 2	2	438	Claudia	Gesell	GER	121.06	Q		2	118.93		Heat 2	2		Agnes	Samaria	NAM	120.05	Q		5	119.62		Heat 2	2	484	Hasna	Benhassi	MAR	120.77	Q		5	118.41		Heat 2	2	478	Marilyn	Okoro	GBR	121.79	Q		2	119.63		Heat 2	2
Heat 2	3	1025	Lucia	Klocová	SVK	121.14	Q		3	120.6		Heat 2	3		Élisabeth	Grousselle	FRA	120.31	Q		7	119.46		Heat 2	3	777	Kameisha	Bennett	USA	121.78	Q		2	119.99		Heat 2	3	353	Zulia	Calatayud	CUB	121.81	Q		6	120.34		Heat 2	3
Heat 2	4	390	Joanne	Fenn	GBR	121.27	q	SB	8	119.74		Heat 2	4		Natalya	Khrushcheleva	RUS	120.56	q		3	116.59		Heat 2	4	284	Susan	Scott	GBR	122	Q		6	121.23		Heat 2	4	973	Alysia	Montano	USA	122.11			3	119.29		Heat 2	DQ
Heat 2	5	654	Faith	Macharia	KEN	121.36	q		1	119.23		Heat 2	5		Diane	Cummins	CAN	121.19	q		6	119.22		Heat 2	5	85	Teodora	Kolarova	BUL	122.45			1	121.14		Heat 2	5	345	Rosibel	García	COL	122.86			8	120.02		Heat 2	5
Heat 2	6	758	Agnes	Samaria	NAM	121.51	q	SB	4	120.55		Heat 2	6		Miho	Sato	JPN	122.82			2	120.46		Heat 2	6	442	Miho	Sato	JPN	122.82			4	120.45		Heat 2	6	324	Qing	Liu	CHN	124.35			4	122.29		Heat 2	6
Heat 2	7	999	Brigita	Langerholc	SLO	121.55	q		5	120.47		Heat 2	7		Adama	Njie	GAM	130.02			4			Heat 2	7	772	Marcela	Britos	URU	130.21			7	129.07		Heat 2	7	206	Lillian	Silva	ANG	129.17			7	126.67		Heat 2	7
Heat 2	8	205	Noelly	Mankatu	COD	127.12		NR	8															Heat 2	8	171	Markabo	Liban	DJI	170.95			8	164.5
	9	736	Uyanga	Khaynkhirvaa	MGL	147.96		SB	6
Heat 3	1	917	Natalya	Khrushcheleva	RUS	123.74	Q		4	118.05		Heat 3	1		Kelly	Holmes	GBR	120.81	Q		3	118.71		Heat 3	1	824	Alice	Schmidt	USA	127.1	Q		6	119.29		Heat 3	1	689	Maria	Mutola	MOZ	120	Q		5	118.21		Heat 3	1
Heat 3	2	397	Kelly	Holmes	GBR	123.75	Q		5	119.21		Heat 3	2		Jearl	Clark	USA	121.33	Q		1	118.03		Heat 3	2	189	Mayte	Martínez	ESP	127.34	Q		3	119.44		Heat 3	2	476	Jennifer	Meadows	GBR	120.14	Q	PB	4	119.88		Heat 3	2
Heat 3	3	874	Maria	Cioncan	ROU	123.9	Q		3	119.68		Heat 3	3		Michelle	Ballentine	JAM	121.52	Q		4	119.92		Heat 3	3	566	Ewelina	Setowska-Dryk	POL	127.37	Q		7	120.71		Heat 3	3	856	Brigita	Langerholc	SLO	120.2	Q		2	119.93		Heat 3	3
Heat 3	4	1147	Jearl	Clark	USA	124.21			8	118.61		Heat 3	4		Letitia	Vriesde	SUR	121.7	q		7	121.03		Heat 3	4	506	Myint	Aye	MYA	128.5			4	121.8		Heat 3	4	753	Ewelina	Setowska-Dryk	POL	120.45	q		9	119.64		Heat 3	4
Heat 3	5	1074	Abir	Nakhli	TUN	124.43			1	124.29		Heat 3	5		Tamsyn	Manou	AUS	122.67			2	120.96		Heat 3	5	343	Marian	Burnett	GUY	129.88			8	120.59		Heat 3	5	566	Elisa	Piccione	ITA	120.54	q		6	119.22		Heat 3	5
Heat 3	6	243	Adriana	Muñoz	CUB	124.58			2	121.07		Heat 3	6		Tatyana	Roslanova	KAZ	126.39			8	119.5		Heat 3	DQ	614	Tatyana	Andrianova	RUS	126.38	Q		5	116.07		Heat 3	6	662	Eliane	Saholinirina	MAD	126.57		PB	3	126.97		Heat 3	DQ
Heat 3	7	89	Sandra	Stals	BEL	126.12			6	121.07		Heat 3	7		Sanaa	Abubkheet	PLE	152.1			6			Heat 3		4	Nahida	Touhami	ALG	DNS		2		121.96		Heat 3	7	653	Fatimoh	Muhammed	LBR	127.28		NR	7	121.89		Heat 3	7
	8	386	Adama	Njie	GAM	137.04			7	125.14		Heat 3			Anhel	Cape	GBS	DNF			5															Heat 3	8	729	Gharid	Ghrouf	PLE	150.35		PB	8
Heat 4	1	51	Stephanie	Graf	AUT	123.39	Q		4	117.99		Heat 4	1		Svetlana	Cherkasova	RUS	123.6	Q		4	117.5		Heat 4	1	620	Svetlana	Cherkasova	RUS	120.62	Q		7	116.93		Heat 4	1	666	Hasna	Benhassi	MAR	120.31	Q		7	119.31		Heat 4	1
Heat 4	2	920	Svetlana	Klyuka	RUS	123.68	Q		1	118.47		Heat 4	2		Mina	Hammou	MAR	123.9	Q		2	118.92		Heat 4	2	258	Laetitia	Valdonado	FRA	120.87	Q		4	119.54		Heat 4	2	481	Jemma	Simpson	GBR	120.47	Q		3	120.18		Heat 4	2
Heat 4	3	703	Seltana	Hammou	MAR	124.01	Q		8	119.74		Heat 4	3		Joanne	Fenn	GBR	123.72	Q		7	119.5		Heat 4	3	47	Sviatlana	Usovich	BLR	121.09	Q		1	118.17		Heat 4	3	778	Liliana	Barbulescu	ROU	120.73	Q		4	120.08		Heat 4	3
Heat 4	4	745	Tanya	Blake	MLT	124.61			2	119.56		Heat 4	4		Claudia	Gesell	GER	123.87			6	121.27		Heat 4	4	702	Lucia	Klocová	SVK	121.63	Q	SB	3	121.65		Heat 4	4	220	Tamsyn	Manou	AUS	121.21			6	119.37		Heat 4	4
Heat 4	5	1092	Yuliya	Krevsun	UKR	124.93			3	121.08		Heat 4	5		Akosua	Serwaa	GHA	123.96			8	119.6		Heat 4	5	754	Tetiana	Petlyuk	UKR	121.78	q	SB	2	121.86		Heat 4	5	920	Yuliya	Krevsun	UKR	122.45			5	117.63		Heat 4	5
Heat 4	6	664	Tatiana	Borisova	KGZ	125.31			6	123.75		Heat 4	6		Faith	Macharia	KEN	126.31			3	120.5		Heat 4	6	483	Seltana	Hammou	MAR	122.16			5	120.54		Heat 4	6	383	Rikke	Rønholt-Albertsen	DEN	123.75		SB	8	122.7		Heat 4	6
Heat 4	7	755	Myint	Aye	MYA	125.41		NR	7	127.7		Heat 4	7		Emilia	Ondo	GEQ	144.88			5			Heat 4	7	376	Elisa	Piccione	ITA	125.95			8	120.96		Heat 4	7	616	Ayako	Jinnouchi	JPN	127.34			2	125.11		Heat 4
Heat 4	8	644	Tatyana	Roslanova	KAZ	127.98			5	120.98														Heat 4	8	541	Gulnaz	Ara	PAK	133.87		SB	6
Heat 5	1	749	Tina	Paulino	MOZ	121.06	Q	SB	7	121.22		Heat 5	1		Jolanda	Batageli	SLO	120.61	Q		3	117.68		Heat 5	1	624	Larisa	Chzhao	RUS	120.64	Q		4	117.33		Heat 5	1	258	Sviatlana	Usovich	BLR	119.95	Q	SB	2	120.53		Heat 5	1
Heat 5	2	1017	Anita	Brägger	SUI	121.09	Q		2	120.59		Heat 5	2		Mayte	Martínez	ESP	120.81	Q		2	119.52		Heat 5	2	504	Maria	Mutola	MOZ	120.71	Q		7	118.49		Heat 5	2	594	Kenia	Sinclair	JAM	120.35	Q		6	118.61		Heat 5	2
Heat 5	3	464	Akosua	Serwaa	GHA	121.17	Q		5	120.74		Heat 5	3		Nicole	Teter	USA	121.16	Q		6	118.52		Heat 5	3	395	Michelle	Ballentine	JAM	121.05	Q	SB	3	121.47		Heat 5	3	303	Diane	Cummins	CAN	120.38	Q		8	119.75		Heat 5	3
Heat 5	4	148	Diane	Cummins	CAN	121.2	q		6	118.89		Heat 5	4		Luciana	Mendes	BRA	121.36	q		4	119.49		Heat 5	4	597	Mihaela	Neacsu	ROU	121.35	Q		6	119.78		Heat 5	4	924	Tetiana	Petlyuk	UKR	120.45	q		4	118.67		Heat 5	4
Heat 5	5	1021	Letitia	Vriesde	SUR	121.24	q	SB	4	121.81		Heat 5	5		Lucia	Klocová	SVK	122.17	q		7	121.03		Heat 5	5	299	Monika	Merl	GER	121.56	q		8	121		Heat 5	5	954	Hazel	Clark	USA	120.61	q		9	119.07		Heat 5	5
Heat 5	6	42	Tamsyn	Manou	AUS	121.43	q		1	119.35		Heat 5	6		Binnaz	Uslu	TUR	123.46			8	120.94		Heat 5	6	700	Letitia	Vriesde	SUR	121.65	q	SB	5	122.18		Heat 5	6	664	Seltana	Hammou	MAR	120.74		SB	5	121.13		Heat 5	6
Heat 5	7	826	Wesam	Abubkheet	PLE	149.86		NR	3	149		Heat 5	7		Marie-Lyne	Joseph	DMA	140.23			5			Heat 5	7	93	Diane	Cummins	CAN	121.71	q		1	120.52		Heat 5	7	533	Nicole	Layson	GUM	156.14			3	155.45		Heat 5	7
		997	Jolanda	Batageli	SLO	DNS		8		117.44														Heat 5		317	Akosua	Serwaa	GHA	DNS		2		127.2		Heat 5		942	Marcela	Britos	URU	DNS		7		129.77
Heat 6												Heat 6	1		Tatyana	Andrianova	RUS	123.77	Q		3	116.23														Heat 6	1	642	Janeth	Busienei	KEN	118.95	Q	SB	3	119.14		Heat 6	1
Heat 6												Heat 6	2		Seltana	Hammou	MAR	123.95	Q		6	119.87														Heat 6	2	398	Mayte	Martínez	ESP	119.58	Q	SB	9	119.74		Heat 6	2
Heat 6												Heat 6	3		Zulia	Calatayud	CUB	123.99	Q		8	119.24														Heat 6	3	878	Lucia	Klocová	SVK	119.72	Q	PB	6	119.88		Heat 6	3
Heat 6												Heat 6	4		Anita	Brägger	SUI	124			5	119.91														Heat 6	4	693	Agnes	Samaria	NAM	119.76	q	SB	7	121.28		Heat 6	4
Heat 6												Heat 6	5		Hazel	Clark	USA	125.67			2	119.32														Heat 6	5	447	Élodie	Guégan	FRA	120.43	q	PB	8	120.56		Heat 6	5
Heat 6												Heat 6	6		Noelly	Mankatu	COD	126.23			4	126.17														Heat 6	6	1018	Elizet	Banda	ZAM	129.9			5	127.2		Heat 6	6
Heat 6												Heat 6	7		Tanya	Blake	MLT	139.34			7	123.81														Heat 6	7	301	Mireille	Derebona	CAF	150.08		SB	2			Heat 6
																																				Heat 6	DQ	799	Svetlana	Cherkasova	RUS	120.93			4
Heat 7
Heat 7
Heat 7
Heat 7
Heat 7
Heat 7
Heat 7
Heat 8
Heat 8
Heat 8
Heat 8
Heat 8
Heat 8
Heat 8
Heat 8
Heat 9
Heat 9
Heat 9
Heat 9
Heat 9
Heat 9
Heat 9
Heat 9
	Semi-finals												Semi-finals												Semi-finals												Semi-finals												Semi-finals
Semi 1	1	51	Stephanie	Graf	AUT	119.26	Q		4	117.99		Semi 1	1		Kelly	Holmes	GBR	117.98	Q	SB	4	118.71		Semi 1	1	782	Hazel	Clark	USA	119	Q		4	117.99		Semi 1	1	258	Sviatlana	Usovich	BLR	118.11	Q	PB	8	119.95		Semi-final 1	1
Semi 1	2	917	Natalya	Khrushcheleva	RUS	119.39	Q		3	118.05		Semi 1	2		Tatyana	Andrianova	RUS	118.41	Q		6	116.23		Semi 1	2	624	Larisa	Chzhao	RUS	119.07	Q		5	117.33		Semi 1	2	819	Olga	Kotlyarova	RUS	118.56	Q		5	118.14		Semi-final 1	2
Semi 1	3	390	Joanne	Fenn	GBR	120.56		SB	6	119.74		Semi 1	3		Jearl	Clark	USA	118.71	q		5	118.03		Semi 1	3	504	Maria	Mutola	MOZ	119.29	q		3	118.49		Semi 1	3	878	Lucia	Klocová	SVK	118.62		PB	6	119.72		Semi-final 1	3
Semi 1	4	1021	Letitia	Vriesde	SUR	120.88		SB	5	121.24		Semi 1	4		Zulia	Calatayud	CUB	119.21	q	SB	3	119.24		Semi 1	4	189	Mayte	Martínez	ESP	119.4	q	SB	6	119.44		Semi 1	4	566	Elisa	Piccione	ITA	118.63		PB	4	119.22		Semi-final 1	4
Semi 1	5	654	Faith	Macharia	KEN	121.3			1	119.23		Semi 1	5		Agnes	Samaria	NAM	119.37		SB	7	119.62		Semi 1	5	482	Mina	Hammou	MAR	120.22			1	120.09		Semi 1	5	778	Liliana	Barbulescu	ROU	120.07		SB	3	120.08		Semi-final 1	5
Semi 1	6	999	Brigita	Langerholc	SLO	121.58			7	120.47		Semi 1	6		Élisabeth	Grousselle	FRA	120.21			2	119.46		Semi 1	6	597	Mihaela	Neacsu	ROU	120.63			2	119.78		Semi 1	6	481	Jemma	Simpson	GBR	120.48			2	120.18		Semi-final 1	6
Semi 1	7	1161	Jennifer	Toomey	USA	122.35			8	119.75		Semi 1	7		Mina	Hammou	MAR	120.66			1	118.92		Semi 1	7	702	Lucia	Klocová	SVK	120.64		SB	8	121.63		Semi 1	7	303	Diane	Cummins	CAN	120.51			9	119.75		Semi-final 1	7
Semi 1	8	42	Tamsyn	Manou	AUS	125.11			2	119.35		Semi 1	8		Michelle	Ballentine	JAM	120.94			8	119.92		Semi 1	8	284	Susan	Scott	GBR	121.17		SB	7	121.23		Semi 1	8	954	Hazel	Clark	USA	122.92			7	119.07		Semi-final 1	8
Semi 2	1	748	Maria	Mutola	MOZ	118.45	Q		4	115.55		Semi 2	1		Hasna	Benhassi	MAR	118.59	Q	SB	6	119.11		Semi 2	1	147	Zulia	Calatayud	CUB	117.92	Q	SB	3	118.07		Semi 2	1	815	Svetlana	Klyuka	RUS	118.97	Q		6	118.63		Semi-final 2	1
Semi 2	2	397	Kelly	Holmes	GBR	118.86	Q	SB	5	119.21		Semi 2	2		Jolanda	Batageli	SLO	118.8	Q		4	117.68		Semi 2	2	620	Svetlana	Cherkasova	RUS	118.58	Q		4	116.93		Semi 2	2	398	Mayte	Martínez	ESP	119.32	Q	SB	7	119.58		Semi-final 2	2
Semi 2	3	148	Diane	Cummins	CAN	119.58	q		2	118.89		Semi 2	3		Tetiana	Petlyuk	UKR	119.48		PB	8	119.62		Semi 2	3	416	Kenia	Sinclair	JAM	119.45			5	118.88		Semi 2	3	663	Mina	Hammou	MAR	119.51		SB	3	120.85		Semi-final 2	3
Semi 2	4	464	Akosua	Serwaa	GHA	120.42	q	NR	7	120.74		Semi 2	4		Nicole	Teter	USA	119.5			3	118.52		Semi 2	4	93	Diane	Cummins	CAN	120.1		SB	1	120.52		Semi 2	4	478	Marilyn	Okoro	GBR	119.63		PB	5	119.63		Semi-final 2	4
Semi 2	5	874	Maria	Cioncan	ROU	120.72			8	119.68		Semi 2	5		Natalya	Khrushcheleva	RUS	120.68			5	116.59		Semi 2	5	507	Agnes	Samaria	NAM	120.13			8	119.91		Semi 2	5	594	Kenia	Sinclair	JAM	120.25			4	118.61		Semi-final 2	5
Semi 2	6	1025	Lucia	Klocová	SVK	120.73			6	120.6		Semi 2	6		Lucia	Klocová	SVK	120.79		SB	7	121.03		Semi 2	6	824	Alice	Schmidt	USA	121.43			6	119.29		Semi 2	6	924	Tetiana	Petlyuk	UKR	120.9			8	118.67		Semi-final 2	6
Semi 2	7	956	Natalya	Evdokimova	RUS	121.17			3	118.75		Semi 2	7		Marian	Burnett	GUY	122.21			2	119.47		Semi 2	7	700	Letitia	Vriesde	SUR	122.07			7	121.65		Semi 2	7	534	Marian	Burnett	GUY	121.02			2	119.84		Semi-final 2	7
Semi 2	8	263	Heidi	Jensen	DEN	121.73		SB	1	122.01		Semi 2	8		Mayte	Martínez	ESP	123.3			1	119.52		Semi 2	8	299	Monika	Merl	GER	122.09			2	121		Semi 2	8	353	Zulia	Calatayud	CUB	126.97			9	120.34		Semi-final 2	DQ
Semi 3	1	702	Mina	Hammou	MAR	120.57	Q		4	117.82		Semi 3	1		Maria	Mutola	MOZ	119.3	Q		5	117.47		Semi 3	1	484	Hasna	Benhassi	MAR	121.59	Q		5	118.41		Semi 3	1	642	Janeth	Busienei	KEN	116.17	Q		6	118.95		Semi-final 3	1
Semi 3	2	438	Claudia	Gesell	GER	121.01	Q		3	118.93		Semi 3	2		Maria	Cioncan	ROU	119.44	Q	PB	7	119.64		Semi 3	2	258	Laetitia	Valdonado	FRA	121.9			4	119.54		Semi 3	2	666	Hasna	Benhassi	MAR	116.84	Q	SB	5	119.61		Semi-final 3	2
Semi 3	3	703	Seltana	Hammou	MAR	121.34			8	119.74		Semi 3	3		Svetlana	Cherkasova	RUS	119.8			3	117.5		Semi 3	3	566	Ewelina	Setowska-Dryk	POL	122.02			1	120.71		Semi 3	3	689	Maria	Mutola	MOZ	116.98	q	SB	7	118.21		Semi-final 3	3
Semi 3	4	920	Svetlana	Klyuka	RUS	121.61			2	118.47		Semi 3	4		Diane	Cummins	CAN	120.3			4	119.22		Semi 3	4	47	Sviatlana	Usovich	BLR	122.34			6	118.17		Semi 3	4	856	Brigita	Langerholc	SLO	118.41	q	PB	8	119.93		Semi-final 3	4
Semi 3	5	749	Tina	Paulino	MOZ	121.85			5	121.06		Semi 3	5		Joanne	Fenn	GBR	120.6			8	119.5		Semi 3	5	754	Tetiana	Petlyuk	UKR	122.46			2	121.78		Semi 3	5	476	Jennifer	Meadows	GBR	119.39		PB	3	119.88		Semi-final 3	5
Semi 3	6	526	Judit	Varga	HUN	122.2			7	119.46		Semi 3	6		Seltana	Hammou	MAR	120.64			2	119.87		Semi 3	6	395	Michelle	Ballentine	JAM	123.98			8	121.05		Semi 3	6	447	Élodie	Guégan	FRA	119.46		PB	9	120.43		Semi-final 3	6
Semi 3	7	1017	Anita	Brägger	SUI	122.34			6	120.59		Semi 3	7		Luciana	Mendes	BRA	122			1	119.49		Semi 3	DQ	614	Tatyana	Andrianova	RUS	121.35	Q		3	116.07		Semi 3	7	753	Ewelina	Setowska-Dryk	POL	121.02			4	119.64		Semi-final 3	7
Semi 3	8	758	Agnes	Samaria	NAM	122.66			1	120.55		Semi 3	8		Letitia	Vriesde	SUR	126.95			6	121.03		Semi 3		777	Kameisha	Bennett	USA	DNF			7	119.99		Semi 3	8	693	Agnes	Samaria	NAM	122.25			2	119.76		Semi-final 3	DNF
	Final												Final												Final												Final												Final
Final	1			Mutola		119.89			5	115.55		Final	1			Holmes		116.38		SB	3	117.98		Final	1			Calatayud		118.82			3	117.92		Final	1			Busienei		116.04		PB	4	116.17		Final	1
Final	2			Holmes		120.18			4	118.86		Final	2			Benhassi		116.43		PB	7	118.59		Final	2			Benhassi		119.42			1	118.41		Final	2			Benhassi		116.99			6	116.84		Final	2
Final	3			Khrushcheleva		120.29			2	118.05		Final	3			Batageli		116.43		SB	4	117.68		Final	DQ			Andrianova		119.6			5	116.07		Final	3			Martinez		117.62		PB	9	119.32		Final	3
Final	4			Ait Hammou		121.09			6	117.82		Final	4			Mutola		116.51		SB	5	117.47		Final	4			Mutola		119.71			2	118.49		Final	4			Kotylarova		118.22			8	118.14		Final	4
Final	5			Gesell		121.84			1	118.93		Final	5			Andrianova		116.88			6	116.23		Final	5			Martinez		119.99			7	119.4		Final	5			Langerholc		118.52			3	118.41		Final	5
Final	6			Cummins		122.48			7	118.89		Final	6			Miles Clark		117.27		SB	2	118.03		Final	6			Chzhao		120.25			6	117.33		Final	6			Usovich		118.92			5	118.11		Final	6
Final	7			Serwaa		123.24			8	120.42		Final	7			Cioncan		119.62			1	119.44		Final	7			Cherkasova		120.71			4	116.93		Final	7			Klyuka		120.9			2	118.63		Final	7
Final				Graf		DNS		3		117.99		Final	8			Calatayud		120.95			8	119.21		Final	8			Clark		121.52			8	117.99		Final				Mutola		DNF			7	116.98		Final	8
						Q	q											Q	q											Q	q											Q	q
				Heats	1	2	2									Heats	1	1										Heats	1	2	1									Heats	1	4
					2	3											2	3											2	2	1										2	3
					3	2	1										3	3	1										3	4											3	2	1
					4	2	2										4	3	1										4	2											4	2
					5	2	2										5	1											5	2	1										5	3	1
					6		1										6	2	2										6	4											6	1	1
					7	2											7	3	2										7	3											7	2	1
					8	2	1										8	2											8	1	1										8	1	2
				Semi-finals	1											Semi-finals	1											Semi-finals	1											Semi-finals	1
					2		1										2												2												2
					3	2											3		1										3	2	1										3
					4	3											4	2											4	2											4	2
					5	1											5	1	1										5	2											5	2
					6												6	2											6		1										6	1	1
					7		1										7	1											7												7	1	1
					8												8												8												8
				Final	1											Final	1											Final	1				2							Final	1
					2				3								2												2												2
					3												3				1								3				1								3				1
					4				2								4				3								4												4
					5				1								5												5				3								5				2
					6												6												6												6
					7												7				2								7												7
					8												8												8												8				3
				Heat 1	7	13	2									Heat 1	6	9	1									Heat 1	7	6										Heat 1	6	11
				Heat 2	8	8	4									Heat 2	6	9	2									Heat 2	6	6										Heat 2	7	9
				Heat 3	7											Heat 3	6		1									Heat 3	5											Heat 3	7		2
				Heat 4	8											Heat 4	6											Heat 4	7		1									Heat 4	7
				Heat 5	6		3									Heat 5	6		2									Heat 5	7		3									Heat 5	6		2
																Heat 6	6																							Heat 6	5		2
				Semi-final 1												Semi-final 1			2									Semi-final 1			2									Semi-final 1
				Semi-final 2			2									Semi-final 2												Semi-final 2												Semi-final 2
				Semi-final 3												Semi-final 3												Semi-final 3												Semi-final 3			2
							6												4												0												2
							3												2												4												4
									5												1												4												6
									5												6												3												6
									5												6												5												6
									5												6												5												6
									5												6												5												6
									5												6												5												5
									5												6												5												6
									5												6												5												4
									3												3												3												3
									3												3												3												3
									3												3												3												3
									3												3												3												3
									3												3												3												3
									3												3												3												3
									3												3												3												3
									3												3												3												3
Heats			Outliers excluded			122.086												123.033												122.6												121.46
						121.977												120.762												121.765												123.406
						124.39												122.403												127.578												122.169
						124.915												124.227												122.014												122.323
						121.198												121.595												121.239												120.413
																		124.602																								119.688
			Outliers included			124.041												124.364												124.084												124.743
						124.864												122.084												128.969												123.406
						125.971												126.646												127.762												125.691
						124.915												127.177												123.496												122.323
						125.293												124.257												121.239												125.517
																		126.707																								124.919
			Fastest losers		1	121.156	0.872745			119.856	1.07632		1	119.266	0.366374			119.082	0.848923
					2	121.308	1.11581			119.425	1.07239		2	119.205	0.714523			118.477	1.14181
					3	121.426	1.50512			119.844	0.874773		3	118.259	0.639462			118.432	1.30363
					4	121.105	1.69393			120.431	1.27502
					5	121.072	0.686717			120.285	1.22554
					6	121.056	0.999804			120.454	0.793112
					7
					8
SF						121.304												119.436												119.927												119.737
						120.207												120.419												120.221												119.943
						121.698												120.297												122.234												118.815
						121.304												119.436												119.927												119.737
						120.207												120.419												120.221												120.821
						121.698												121.129												122.234												118.815
			Heats	q	Expected
		2003	5	9	1.8
		2004	6	6	1
		2005	5	4	0.8
		2007	6	6	1
		2008	6	6	1
		2009	6	6	1
		2011	5	3	0.6
		2012	6	6	1
		2013	6	6	1
		2015	6	6	1
		2016	8	8	1
		2017	6	6	1
				1	12.2		9
				2	12.2		14
				3	12.2		7
				4	12.2		11
				5	12.2		13
				6	9		13
				7	1		0
				8	1		0
[truncated: 70 more columns]
